# Supplementary material
Source: Springer Nature journal article supplement (https://www.springermedizin.de/resource/supplementary/12968_2013_3954_MOESM4_ESM.pdf/9584962)

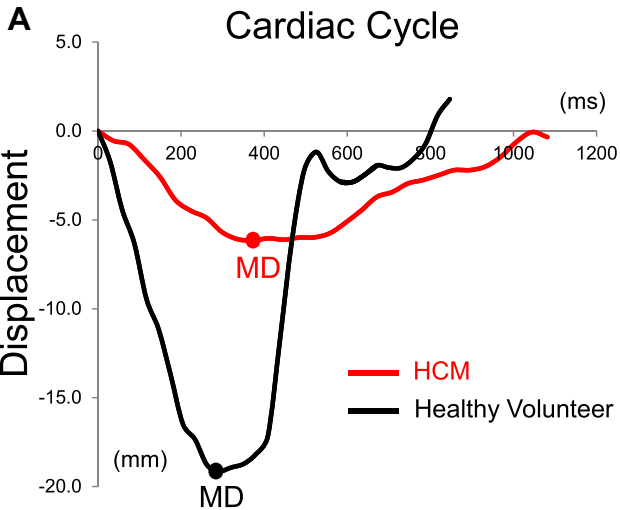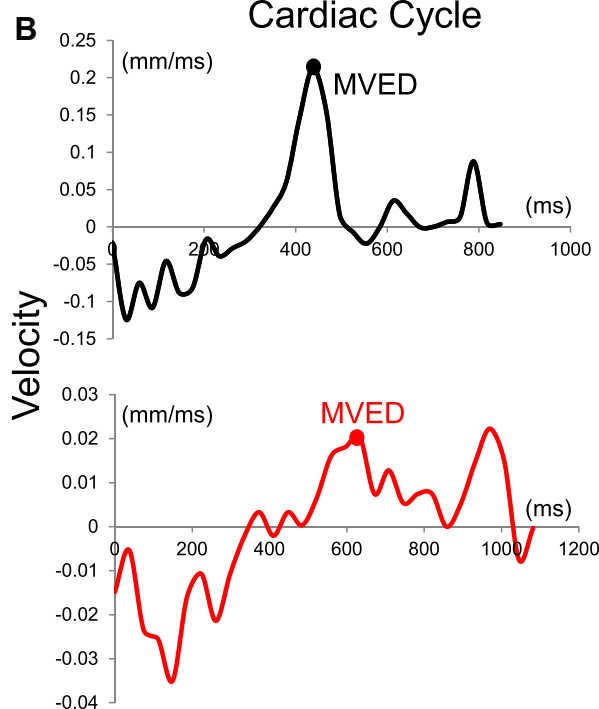

Supplement: MOESM4 [file 9584962]
